# Supplementary material for: Identification of the Genes of the Plant Pathogen Pseudomonas syringae MB03 Required for the Nematicidal Activity Against Caenorhabditis elegans Through an Integrated Approach
Source: Frontiers journal article supplement (doi:10.3389/fmicb.2022.826962), 2022-03-09
Supplement: Data_Sheet_6.PDF [file Data_Sheet_6.PDF]

**Table S8. Homologs of nematocidal genes of *P. aeruginosa* PAO1 and PA14 found in *P. syringae* MB03**

| No                               | Gene in PAO1 | PAO1/PA14 locus tag | PS Core | Length (aa) | MB03 locus tag | H value | Function                                                                                          | PA14*   |
|----------------------------------|--------------|---------------------|---------|-------------|----------------|---------|---------------------------------------------------------------------------------------------------|---------|
| <b><i>P. aeruginosa</i> PAO1</b> |              |                     |         |             |                |         |                                                                                                   |         |
| 1                                | <i>ptsP</i>  | PA0337              | Present | 759         | VT47_23320     | 0.859   | phosphoenolpyruvate-protein phosphotransferase                                                    | Present |
| 2                                | <i>hlyD</i>  | PA0425              | Present | 383         | VT47_19135     | 0.656   | Resistance-Nodulation-Cell Division (RND) multidrug efflux membrane fusion protein MexA precursor | Absent  |
| 3                                | <i>pdxA</i>  | PA0593              | Present | 328         | VT47_22200     | 0.802   | pyridoxal phosphate biosynthetic protein PdxA                                                     | Absent  |
| 4                                | <i>xdhB</i>  | PA1523              | Present | 799         | VT47_08595     | 0.813   | xanthine dehydrogenase                                                                            | Absent  |
| 5                                | <i>kdpB</i>  | PA1634              | Present | 690         | VT47_09695     | 0.835   | potassium-transporting ATPase, B chain                                                            | Absent  |
| 6                                |              | PA2854              | Present | 323         | VT47_09910     | 0.728   | conserved hypothetical protein                                                                    | Absent  |
| 7                                |              | PA3071              | Present | 312         | VT47_08100     | 0.689   | hypothetical protein                                                                              | Absent  |
| 8                                |              | PA3139              | Present | 398         | VT47_09305     | 0.771   | probable amino acid aminotransferase                                                              | Absent  |
| 9                                | <i>prc</i>   | PA3257              | Present | 698         | VT47_07565     | 0.754   | periplasmic tail-specific protease                                                                | Absent  |
| 10                               |              | PA3448              | Present | 274         | VT47_12125     | 0.65    | probable permease of ABC transporter                                                              | Absent  |
| 11                               |              | PA3449              | Present | 333         | VT47_12130     | 0.64    | conserved hypothetical protein                                                                    | Absent  |
| 12                               |              | PA3460              | Present | 585         | VT47_17860     | 0.73    | probable acetyltransferase                                                                        | Absent  |
| 13                               | <i>rpoS</i>  | PA3622              | Present | 334         | VT47_06765     | 0.884   | sigma factor RpoS                                                                                 | Absent  |
| 14                               | <i>mucP</i>  | PA3649              | Present | 450         | VT47_06645     | 0.762   | conserved hypothetical protein                                                                    | Absent  |
| 15                               |              | PA3799              | Present | 493         | VT47_06145     | 0.805   | conserved hypothetical protein                                                                    | Absent  |
| 16                               |              | PA3950              | Present | 449         | VT47_20640     | 0.682   | probable ATP-dependent RNA helicase                                                               | Absent  |
| 17                               | <i>rlpA</i>  | PA4000              | Present | 342         | VT47_20920     | 0.669   | hypothetical protein                                                                              | Absent  |
| 18                               |              | PA4113              | Present | 396         | VT47_04270     | 0.644   | probable major facilitator superfamily (MFS) transporter                                          | Absent  |
| 19                               | <i>tufA</i>  | PA4265              | Present | 397         | VT47_21815     | 0.869   | elongation factor Tu                                                                              | Absent  |

|    |             |        |         |     |            |       |                                       |         |
|----|-------------|--------|---------|-----|------------|-------|---------------------------------------|---------|
| 20 | <i>hisD</i> | PA4448 | Present | 440 | VT47_19735 | 0.886 | histidinol dehydrogenase              | Absent  |
| 21 | <i>pilD</i> | PA4528 | Present | 290 | VT47_03925 | 0.79  | type 4 prepilin peptidase PilD        | Absent  |
| 22 |             | PA4684 | Present | 432 | VT47_04220 | 0.815 | hypothetical protein                  | Absent  |
| 23 |             | PA4767 | Present | 144 | VT47_20085 | 0.743 | conserved hypothetical protein        | Absent  |
| 24 | <i>smpB</i> | PA4768 | Present | 159 | VT47_20095 | 0.812 | SmpB protein                          | Absent  |
| 25 |             | PA5138 | Present | 250 | VT47_23530 | 0.668 | hypothetical protein                  | Absent  |
| 26 |             | PA5202 | Present | 129 | VT47_01295 | 0.643 | hypothetical protein                  | Absent  |
| 27 | <i>gshA</i> | PA5203 | Present | 527 | VT47_01290 | 0.695 | glutamate-cysteine ligase             | Present |
| 28 | <i>crc</i>  | PA5332 | Present | 259 | VT47_01090 | 0.865 | catabolite repression control protein | Absent  |
| 29 | <i>phoB</i> | PA5360 | Present | 229 | VT47_24190 | 0.943 | two-component response regulator PhoB | Absent  |
| 30 | <i>phoR</i> | PA5361 | Present | 443 | VT47_24195 | 0.752 | two-component sensor PhoR             | Absent  |

***P. syringae* PA14**

|    |               |            |         |     |            |       |                                                      |  |
|----|---------------|------------|---------|-----|------------|-------|------------------------------------------------------|--|
| 1  | <i>ptsP</i>   | PA14_04410 | Present | 759 | VT47_23320 | 0.859 | phosphoenolpyruvate-protein phosphotransferase       |  |
| 2  | <i>aruB</i>   | PA14_52660 | Present | 448 | VT47_16870 | 0.79  | succinylarginine dihydrolase                         |  |
| 3  | <i>pepP</i>   | PA14_69000 | Present | 444 | VT47_01610 | 0.815 | aminopeptidase P                                     |  |
| 4  | <i>cspB</i>   | PA14_05960 | Present | 69  | VT47_05390 | 0.739 | putative major cold shock protein                    |  |
| 5  | <i>fabF1</i>  | PA14_25690 | Present | 414 | VT47_07740 | 0.836 | beta-ketoacyl-acyl carrier protein synthase II       |  |
| 6  | <i>gacA</i>   | PA14_30650 | Present | 214 | VT47_13515 | 0.897 | response regulator GacA                              |  |
| 7  | <i>glnK</i>   | PA14_69810 | Present | 112 | VT47_00880 | 0.973 | Nitrogen regulatory protein PII                      |  |
| 8  | <i>surA</i> , | PA14_07760 | Present | 430 | VT47_22195 | 0.735 | peptidyl-prolyl cis-trans isomerase                  |  |
| 9  | <i>minD</i>   | PA14_22020 | Present | 270 | VT47_07500 | 0.885 | cell division inhibitor MinD                         |  |
| 10 | <i>clpA</i>   | PA14_30230 | Present | 758 | VT47_14845 | 0.904 | ATP-dependent clp protease, ATP-binding subunit ClpA |  |
| 11 | <i>gnyD</i>   | PA14_38440 | Present | 387 | VT47_11890 | 0.868 | Citronelloyl-CoA dehydrogenase, GnyD                 |  |
| 12 | <i>fleN</i>   | PA14_45640 | Present | 280 | VT47_16230 | 0.893 | flagellar synthesis regulator FleN                   |  |
| 13 | <i>lysC</i>   | PA14_52580 | Present | 412 | VT47_16840 | 0.908 | aspartate kinase alpha and beta chain                |  |

|    |                  |            |         |     |            |       |                                              |
|----|------------------|------------|---------|-----|------------|-------|----------------------------------------------|
| 14 |                  | PA14_52610 | Absent  | 334 | VT47_16850 | 0.79  | possible threonine aldolase                  |
| 15 | <i>prpC</i>      | PA14_53950 | Present | 375 | VT47_09990 | 0.853 | citrate synthase 2                           |
| 16 |                  | PA14_41730 | Present | 327 | VT47_09965 | 0.826 | conserved hypothetical protein               |
| 17 | <i>gacS/lemA</i> | PA14_52260 | Absent  | 925 | VT47_17580 | 0.672 | sensor/response regulator hybrid             |
| 18 |                  | PA14_61680 | Present | 276 | VT47_04675 | 0.704 | methyl transferase                           |
| 19 | <i>nusA</i>      | PA14_62770 | Present | 493 | VT47_19975 | 0.876 | transcription elongation factor              |
| 20 | <i>apaH</i>      | PA14_07700 | Present | 283 | VT47_22215 | 0.723 | diadenosine tetraphosphatase                 |
| 21 | <i>nagZ</i>      | PA14_25195 | Absent  | 332 | VT47_15350 | 0.843 | beta-hexosaminidase                          |
| 22 | <i>clpS</i>      | PA14_30210 | Present | 122 | VT47_14850 | 0.803 | ATP-dependent Clp protease adaptor protein   |
| 23 |                  | PA14_31580 | Present | 409 | VT47_11915 | 0.868 | acyl-CoA dehydrogenase                       |
| 24 |                  | PA14_66120 | Absent  | 318 | VT47_02665 | 0.752 | hypothetical protein                         |
| 25 | <i>prpB</i>      | PA14_53940 | Present | 298 | VT47_09985 | 0.862 | carboxyphosphoenolpyruvate phosphonmutase    |
| 26 | <i>dnaK</i>      | PA14_62970 | Present | 637 | VT47_20055 | 0.876 | molecular chaperone                          |
| 27 | <i>miaA</i>      | PA14_65320 | Present | 323 | VT47_02865 | 0.758 | delta 2-isopentenylpyrophosphate transferase |
| 28 | <i>cysQ</i>      | PA14_68370 | Present | 273 | VT47_23770 | 0.67  | 3'(2'),5'-bisphosphate nucleotidase          |
| 29 | <i>gshA</i>      | PA14_68730 | Present | 527 | VT47_01290 | 0.697 | glutamate--cysteine ligase                   |
| 30 | <i>sltBI</i>     | PA14_12080 | Present | 340 | VT47_20925 | 0.738 | soluble lytic transglycosylase B             |
| 31 | <i>galU</i>      | PA14_38350 | Present | 279 | VT47_13815 | 0.846 | UTP-glucose-1-phosphate uridylyltransferase  |
| 32 |                  | PA14_41710 | Present | 508 | VT47_09970 | 0.813 | putative membrain protein                    |
| 33 | <i>mucD</i>      | PA14_54390 | Present | 474 | VT47_18880 | 0.753 | serine protease MucD precursor               |
| 34 | <i>yhdG</i>      | PA14_64180 | Present | 332 | VT47_21130 | 0.801 | putative tRNA-dihydrouridine synthase        |
| 35 | <i>cmpX</i>      | PA14_41590 | Present | 274 | VT47_10035 | 0.807 | cytoplasmic membrane protein                 |
| 36 | <i>rbfA</i>      | PA14_62740 | Present | 129 | VT47_19965 | 0.736 | ribosome-binding factor A                    |
| 37 | <i>uvrC</i>      | PA14_30660 | Present | 608 | VT47_13510 | 0.829 | excinuclease ABC subunit C                   |
| 38 |                  | PA14_49930 | Absent  | 279 | VT47_18045 | 0.735 | hypothetical protein                         |

|    |                  |            |         |     |            |       |                                                    |
|----|------------------|------------|---------|-----|------------|-------|----------------------------------------------------|
| 39 | <i>tolQ</i>      | PA14_51750 | Present | 231 | VT47_06960 | 0.909 | TolQ protein                                       |
| 40 | <i>typA</i>      | PA14_67560 | Present | 605 | VT47_23145 | 0.803 | GTP-binding protein TypA/BipA                      |
| 41 | <i>aldH</i>      | PA14_70140 | Present | 497 | VT47_01155 | 0.863 | putative aldehyde dehydrogenase                    |
| 42 | <i>gshB</i>      | PA14_05310 | Present | 317 | VT47_02435 | 0.808 | glutathione synthetase                             |
| 43 |                  | PA14_06400 | Present | 308 | VT47_13020 | 0.698 | putative transcriptional regulator, LysR family    |
| 44 | <i>gnyA</i>      | PA14_38480 | Present | 655 | VT47_11875 | 0.716 | putative acyl-CoA carboxylase alpha chain          |
| 45 | <i>tatC</i>      | PA14_66980 | Present | 267 | VT47_01905 | 0.824 | sec-independent protein translocase                |
| 46 |                  | PA14_25830 | Present | 189 | VT47_07790 | 0.767 | conserved hypothetical protein                     |
| 47 |                  | PA14_27230 | Present | 151 | VT47_17210 | 0.676 | putative transcriptional regulator, MarR family    |
| 48 | <i>ppsA</i>      | PA14_41670 | Present | 791 | VT47_10010 | 0.909 | phosphoenolpyruvate synthase                       |
| 49 | <i>aruC</i>      | PA14_52720 | Present | 406 | VT47_16890 | 0.776 | N-succinylglutamate 5-semialdehyde dehydrogenase   |
| 50 | <i>acsA</i>      | PA14_52800 | Present | 651 | VT47_16925 | 0.862 | acetyl-coenzyme A synthetase                       |
| 51 |                  | PA14_41710 | Present | 508 | VT47_09970 | 0.813 | putative membran protein                           |
| 52 | <i>fleQ</i>      | PA14_50220 | Present | 490 | VT47_16350 | 0.827 | transcriptional regulator                          |
| 53 | <i>fixR</i>      | PA14_68040 | Absent  | 245 | VT47_18190 | 0.8   | putative short-chain alcohol dehydrogenase         |
| 54 |                  | PA14_69250 | Present | 196 | VT47_01470 | 0.755 | putative membrane-associated protein               |
| 55 |                  | PA14_07790 | LHV     | 224 | VT47_22180 | 0.683 | putative nucleotidyltransferase                    |
| 56 | <i>accD/gnyB</i> | PA14_38460 | Present | 535 | VT47_11885 | 0.845 | acyl-CoA carboxyltransferase beta chain            |
| 57 | <i>kdpD</i>      | PA14_43350 | Absent  | 885 | VT47_09705 | 0.753 | two-component sensor KdpD                          |
| 58 |                  | PA14_61980 | Present | 231 | VT47_04215 | 0.78  | conserved hypothetical protein                     |
| 59 | <i>pnp</i>       | PA14_62710 | Present | 701 | VT47_19950 | 0.86  | polyribonucleotide nucleotidyltransferase          |
| 60 | <i>vfr</i>       | PA14_08370 | Present | 214 | VT47_21975 | 0.794 | cyclic AMP receptor-like protein                   |
| 61 | <i>crfX</i>      | PA14_41610 | Present | 84  | VT47_10030 | 0.655 | conserved hypothetical protein                     |
| 62 | <i>aruG</i>      | PA14_52690 | Present | 340 | VT47_16880 | 0.85  | arginine/ornithine succinyltransferase AII subunit |
| 63 |                  | PA14_56790 | Present | 687 | VT47_19380 | 0.792 | putative GGDEF domain/EAL domain protein           |

|    |              |            |         |     |            |       |                                                    |
|----|--------------|------------|---------|-----|------------|-------|----------------------------------------------------|
| 64 |              | PA14_57820 | Present | 79  | VT47_19750 | 0.835 | conserved hypothetical protein                     |
| 65 | <i>ccoN</i>  | PA14_10500 | Present | 475 | VT47_16100 | 0.787 | cytochrome c oxidase subunit                       |
| 66 | <i>csdA</i>  | PA14_16930 | Present | 401 | VT47_06570 | 0.661 | putative cysteine sulfinatase desulfinate          |
| 67 | <i>glsA</i>  | PA14_43320 | Absent  | 302 | VT47_10970 | 0.805 | putative glutaminase                               |
| 68 |              | PA14_60800 | Present | 554 | VT47_20470 | 0.865 | putative ABC transporter, ATP-binding protein      |
| 69 |              | PA14_69700 | Present | 233 | VT47_00850 | 0.674 | conserved hypothetical protein                     |
| 70 |              | PA14_07780 | Present | 338 | VT47_22185 | 0.654 | putative phosphotransferase                        |
| 71 | <i>rhlB</i>  | PA14_14040 | Present | 507 | VT47_05280 | 0.764 | ATP-dependent RNA helicase RhlB                    |
| 72 | <i>folE1</i> | PA14_19630 | Present | 186 | VT47_05015 | 0.866 | GTP cyclohydrolase I precursor                     |
| 73 | <i>topA</i>  | PA14_25110 | Present | 868 | VT47_15380 | 0.87  | DNA topoisomerase I                                |
| 74 |              | PA14_41140 | Present | 360 | VT47_08285 | 0.831 | putative ABC transporter, permease protein         |
| 75 |              | PA14_41150 | Present | 339 | VT47_08280 | 0.864 | putative permease of ABC transporter               |
| 76 | <i>pmbA</i>  | PA14_58050 | Present | 449 | VT47_19840 | 0.811 | PmbA protein                                       |
| 77 |              | PA14_11910 | Absent  | 151 | VT47_03215 | 0.748 | conserved hypothetical protein                     |
| 78 | <i>algZ</i>  | PA14_20290 | Present | 108 | VT47_16805 | 0.796 | DNA binding-protein                                |
| 79 | <i>aruD</i>  | PA14_52670 | Absent  | 488 | VT47_16875 | 0.783 | succinylglutamate 5-semialdehyde dehydrogenase     |
| 80 |              | PA14_11250 | Present | 294 | VT47_21485 | 0.782 | putative dTDP-4-rhamnose reductase-related protein |
| 81 | <i>iscS</i>  | PA14_14730 | Present | 404 | VT47_06070 | 0.874 | cysteine desulfurase                               |
| 82 | <i>glpD</i>  | PA14_17930 | Present | 512 | VT47_18640 | 0.73  | glycerol-3-phosphate dehydrogenase                 |
| 83 | <i>sth</i>   | PA14_25390 | Present | 464 | VT47_09025 | 0.851 | soluble pyridine nucleotide transhydrogenase       |
| 84 | <i>atpI</i>  | PA14_73320 | Present | 126 | VT47_24685 | 0.657 | ATP synthase protein I                             |
| 85 | <i>ompH</i>  | PA14_17170 | Present | 168 | VT47_06655 | 0.768 | putative outer membrane protein OmpH               |
| 86 | <i>yadG</i>  | PA14_27770 | Present | 310 | VT47_07640 | 0.813 | putative ABC transporter, ATP-binding protein      |
| 87 | <i>secB</i>  | PA14_67720 | Present | 163 | VT47_23490 | 0.779 | secretion protein SecB                             |

---
